# Supplementary material for: Sulfur substitution in Fe-MOF-74: implications for electrocatalytic CO2 and CO reduction from an ab initio perspective
Source: Royal Society of Chemistry journal article supplement (doi:10.1039/d4cy00217b), 2024-01-01
Supplement: d4cy00217b2.xlsx [file d4cy00217b2.xlsx]

## Sheet: Adsorbate
INT	S	Charge	E	H	G
H2	1	0	-1.172	-1.15886	-1.17365
½ H2	2	0	-0.586002	-0.579428	-0.586826
O	3	0	-75.0869	-75.0845	-75.1018
OH	2	0	-75.7593	-75.7476	-75.7678
H2O	1	0	-76.4536	-76.4286	-76.45
CO2	1	0	-188.656	-188.641	-188.665
OCOH	2	0	-189.158	-189.133	-189.162
OCHO	2	0	-189.147	-189.123	-189.152
CO	1	0	-113.345	-113.336	-113.359
HOCOH	1	0	-189.75	-189.714	-189.742
OCH2O	3	0	-189.662	-189.631	-189.66
HCOOH	1	0	-189.824	-189.787	-189.815
HCO	2	0	-113.886	-113.87	-113.895
COH	2	0	-113.821	-113.804	-113.829
HOCH2O	2	0	-190.341	-190.295	-190.326
HOCHOH	2	0	-190.346	-190.298	-190.328
H2CO	1	0	-114.539	-114.509	-114.534
HCOH	1	0	-114.454	-114.423	-114.449
HOCH2OH	1	0	-191.007	-190.945	-190.975
CH3O	2	0	-115.086	-115.046	-115.073
H2COH	2	0	-115.092	-115.051	-115.078
CH3OH	1	0	-115.756	-115.7	-115.728
C	3	0	-37.8483	-37.8459	-37.8628
CH	2	0	-38.4862	-38.4764	-38.4965
CH2	3	0	-39.1615	-39.1406	-39.1628
CH3	2	0	-39.8457	-39.8126	-39.8372
CH4	1	0	-40.5259	-40.4772	-40.4994
DMF	1	0	-248.375	-248.267	-248.302

## Sheet: Fe-DOBDC
INT	S	Charge	E	H	G
PRECAT	13	0	-7168.07	-7167.06	-7167.23
PRECAT	12	-1	-7168.16	-7167.15	-7167.32
PRECAT	14	-1	-7168.16	-7167.14	-7167.31
CAT	13	0	-6919.66	-6918.75	-6918.91
CAT	12	-1	-6919.77	-6918.86	-6919.02
CAT	14	-1	-6919.76	-6918.86	-6919.01
H	12	0	-6920.21	-6919.3	-6919.45
H	14	0	-6920.23	-6919.32	-6919.48
H2	13	0	-6920.84	-6919.92	-6920.08
CO2	13	0	-7108.33	-7107.41	-7107.57
CO2	12	-1	-7108.43	-7107.51	-7107.67
TS	12	-1	-7108.42	-7107.5	-7107.67
CO2_b	12	-1	-7108.42	-7107.5	-7107.66
CO2_b	14	-1	-7108.4	-7107.48	-7107.65
OCOH	12	0	-7108.85	-7107.92	-7108.08
OCOH	14	0	-7108.87	-7107.93	-7108.1
OCHO	12	0	-7108.89	-7107.95	-7108.12
OCHO	14	0	-7108.94	-7108	-7108.17
CO	13	0	-7033.03	-7032.12	-7032.28
HOCOH	13	0	-7109.47	-7108.52	-7108.68
HOCOH	15	0	-7109.43	-7108.49	-7108.65
OCH2O	13	0	-7109.45	-7108.51	-7108.67
OCH2O	15	0	-7109.48	-7108.53	-7108.69
HCOOH	13	0	-7109.51	-7108.56	-7108.73
HCO	12	0	-7033.6	-7032.66	-7032.82
HCO	14	0	-7033.6	-7032.67	-7032.84
COH	12	0	-7033.55	-7032.63	-7032.79
COH	14	0	-7033.52	-7032.6	-7032.76
HOCH2O	12	0	-7110.07	-7109.11	-7109.27
HOCH2O	14	0	-7110.1	-7109.14	-7109.31
HOCHOH	12	0	-7110.05	-7109.1	-7109.26
HOCHOH	14	0	-7110.05	-7109.1	-7109.26
H2CO	13	0	-7034.22	-7033.28	-7033.45
HCOH	11	0	-7034.17	-7033.22	-7033.39
HCOH	13	0	-7034.18	-7033.24	-7033.4
HOCH2OH	13	0	-7110.69	-7109.72	-7109.88
CH3O	12	0	-7034.81	-7033.86	-7034.02
CH3O	14	0	-7034.85	-7033.9	-7034.06
H2COH	12	0	-7034.79	-7033.84	-7034
H2COH	14	0	-7034.8	-7033.85	-7034.01
CH3OH	13	0	-7035.44	-7034.48	-7034.64
C	11	0	-6957.65	-6956.74	-6956.89
C	13	0	-6957.61	-6956.7	-6956.85
CH	10	0	-6958.23	-6957.31	-6957.46
CH	12	0	-6958.26	-6957.35	-6957.5
CH2	13	0	-6958.91	-6957.98	-6958.14
CH2	15	0	-6958.9	-6957.97	-6958.13
CH3	12	0	-6959.55	-6958.61	-6958.76
CH3	14	0	-6959.57	-6958.62	-6958.78
CH4	13	0	-6960.2	-6959.24	-6959.41
O	13	0	-6994.89	-6993.98	-6994.13
O	15	0	-6994.9	-6993.99	-6994.15
OH	12	0	-6995.5	-6994.58	-6994.74
OH	14	0	-6995.55	-6994.62	-6994.78
H2O	13	0	-6996.13	-6995.2	-6995.36

## Sheet: Fe-DSBDC
INT	S	Charge	E	H	G
PRECAT	13	0	-8459.76	-8458.75	-8458.93
PRECAT	12	-1	-8459.86	-8458.86	-8459.03
PRECAT	14	-1	-8460.06	-8459.06	-8459.23
CAT	13	0	-8211.36	-8210.45	-8210.62
CAT	12	-1	-8211.47	-8210.58	-8210.74
CAT	14	-1	-8211.46	-8210.57	-8210.73
H	12	0	-8211.9	-8211	-8211.16
H	14	0	-8211.92	-8211.01	-8211.18
H2	13	0	-8212.54	-8211.63	-8211.79
CO2	13	0	-8400.03	-8399.11	-8399.28
CO2	12	-1	-8400.14	-8399.23	-8399.4
CO2	14	-1	-8400.13	-8399.21	-8399.38
TS	12	-1	-8400.11	-8399.2	-8399.37
CO2_b	12	-1	-8400.11	-8399.2	-8399.37
OCOH	12	0	-8400.57	-8399.64	-8399.81
OCOH	14	0	-8400.57	-8399.65	-8399.82
OCHO	12	0	-8400.59	-8399.66	-8399.83
OCHO	14	0	-8400.62	-8399.69	-8399.86
CO	13	0	-8324.72	-8323.81	-8323.98
HOCOH	13	0	-8401.14	-8400.2	-8400.37
HOCOH	15	0	-8401.12	-8400.18	-8400.35
OCH2O	13	0	-8401.14	-8400.2	-8400.37
OCH2O	15	0	-8401.14	-8400.2	-8400.37
HCOOH	13	0	-8401.2	-8400.26	-8400.43
HCO	12	0	-8325.29	-8324.37	-8324.54
HCO	14	0	-8325.29	-8324.37	-8324.53
COH	12	0	-8325.29	-8324.37	-8324.54
COH	14	0	-8325.21	-8324.29	-8324.46
HOCH2O	12	0	-8401.76	-8400.8	-8400.98
HOCH2O	14	0	-8401.79	-8400.84	-8401.01
HOCHOH	12	0	-8401.74	-8400.79	-8400.96
HOCHOH	14	0	-8401.73	-8400.78	-8400.95
H2CO	13	0	-8325.91	-8324.97	-8325.14
HCOH	11	0	-8325.86	-8324.93	-8325.1
HCOH	13	0	-8325.86	-8324.93	-8325.1
HOCH2OH	13	0	-8402.38	-8401.42	-8401.59
CH3O	12	0	-8326.5	-8325.56	-8325.73
CH3O	14	0	-8326.53	-8325.59	-8325.76
H2COH	12	0	-8326.48	-8325.54	-8325.71
H2COH	14	0	-8326.48	-8325.54	-8325.71
CH3OH	13	0	-8327.13	-8326.17	-8326.34
C	11	0	-8249.33	-8248.43	-8248.59
C	13	0	-8249.3	-8248.39	-8248.56
CH2	13	0	-8250.59	-8249.67	-8249.84
CH2	15	0	-8250.58	-8249.65	-8249.82
CH3	12	0	-8251.24	-8250.3	-8250.47
CH3	14	0	-8251.24	-8250.31	-8250.47
CH4	13	0	-8251.9	-8250.94	-8251.11
O	13	0	-8286.58	-8285.68	-8285.84
O	15	0	-8286.58	-8285.68	-8285.84
OH	12	0	-8287.19	-8286.27	-8286.44
OH	14	0	-8287.22	-8286.31	-8286.47
H2O	13	0	-8287.82	-8286.9	-8287.06
