# Supplementary material for: Sulfur substitution in Fe-MOF-74: implications for electrocatalytic CO2 and CO reduction from an ab initio perspective
Source: Royal Society of Chemistry journal article supplement (doi:10.1039/d4cy00217b), 2024-01-01
Supplement: d4cy00217b3.pdf [file d4cy00217b3.pdf]

# Sulfur Substitution in Fe-MOF-74: Implications for Electrocatalytic CO<sub>2</sub> and CO Reduction from an *ab initio* Perspective

Gavin A. McCarver,\* Taner Yildirim, and Wei Zhou

*National Institute of Standards and Technology, Center for Neutron Research,  
Gaithersburg, Maryland 20899-6102, United States*

E-mail: gavin.mccarver@nist.gov

## SUPPLEMENTARY INFORMATION

### List of Figures

- S1 Localized molecular orbitals of the highest occupied  $\beta$  orbitals for the Fe centers of Fe<sub>2</sub>DOBDC (left) and Fe<sub>2</sub>DSBDC (right) clusters. Orbital energies (eV) are given below each figure. Color code: C (grey), N (blue), O (red), S (yellow), Fe (gold). Rendered using IboView. . . . . 3
- S2 Reaction coordinate diagram of hydrogen reduction on the Fe<sub>2</sub>DOBDC and Fe<sub>2</sub>DSBDC clusters. . . . . 4

|    |                                                                                                                                                                                                                                                                                                                                 |   |
|----|---------------------------------------------------------------------------------------------------------------------------------------------------------------------------------------------------------------------------------------------------------------------------------------------------------------------------------|---|
| S3 | Molecular structures of the a) Fe <sub>2</sub> DOBDC-H, b) Fe <sub>2</sub> DSBDC-H, c) Fe <sub>2</sub> DOBDC-H <sub>2</sub> , and Fe <sub>2</sub> DSBDC-H <sub>2</sub> intermediates. Color code: H (white), C (grey), N (blue) O (red), S (yellow), Fe (gold). . . . .                                                         | 5 |
| S4 | Localized molecular orbitals comprised of the Fe-H bonds for the a) Fe <sub>2</sub> DOBDC and b) Fe <sub>2</sub> DSBDC clusters. Color code: H (white), C (grey), N (blue), O (red), S (yellow), Fe (gold). . . . .                                                                                                             | 6 |
| S5 | Localized molecular orbitals for the *OCHO (top) and *OCOH (bottom) intermediates. Color code: H (white), C (grey), N (blue) O (red), S (yellow), Fe (gold). . . . .                                                                                                                                                            | 7 |
| S6 | Free energy reaction mechanism for the reduction of CO to CH <sub>4</sub> on the (top) Fe <sub>2</sub> DOBDC and (bottom) Fe <sub>2</sub> DSBDC clusters. All energy values are relative to *CO for each respective cluster. Color code - favorable reduction (black), unfavorable reduction (red), desorption (green). . . . . | 8 |

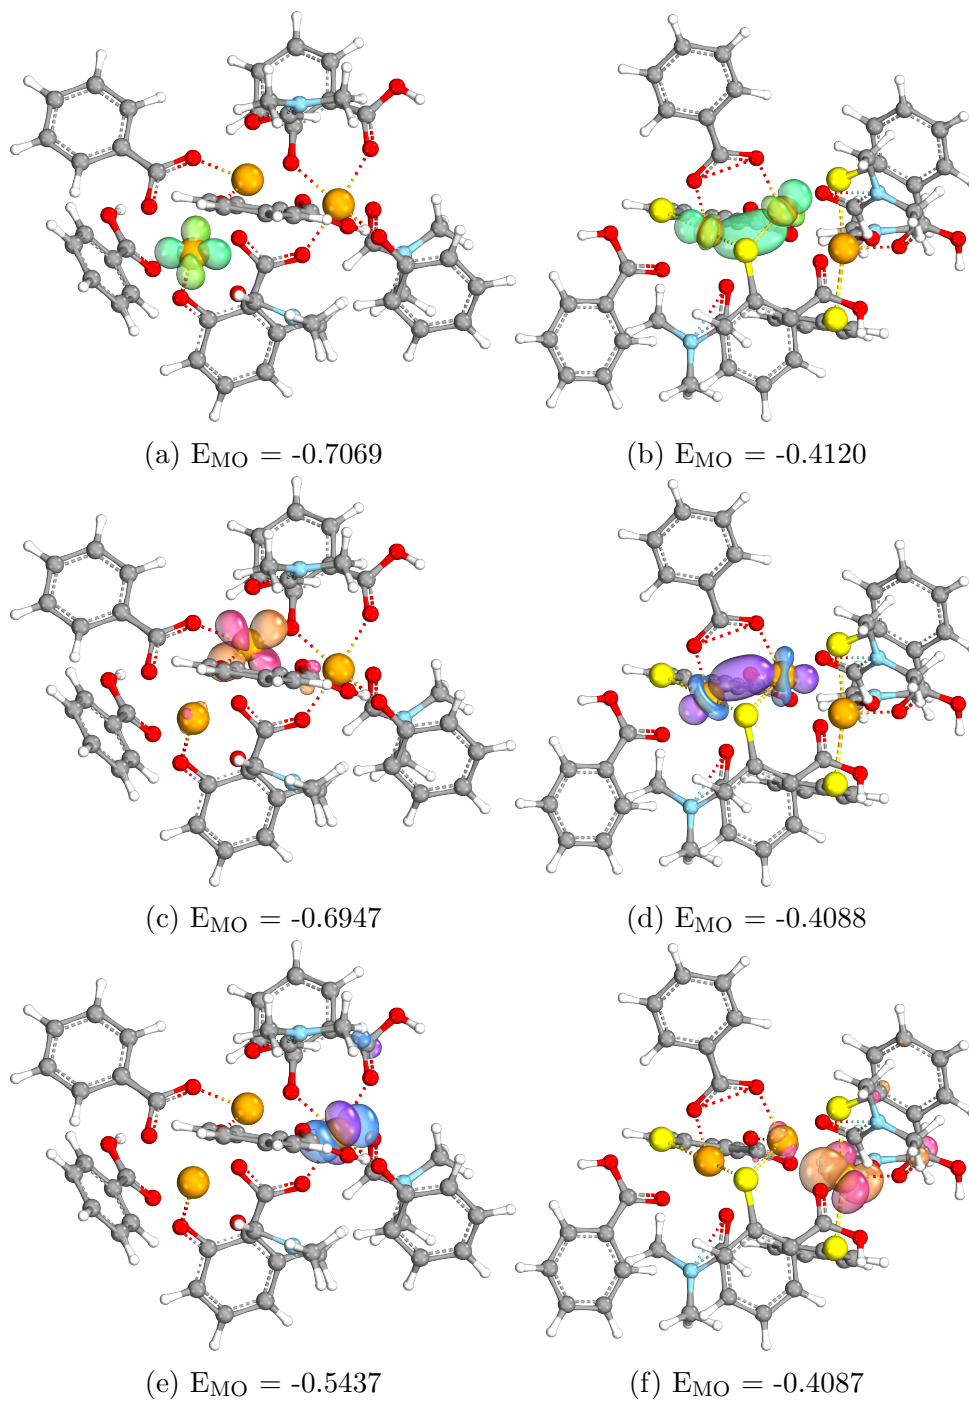

Figure S1: Localized molecular orbitals of the highest occupied  $\beta$  orbitals for the Fe centers of  $\text{Fe}_2\text{DOBDC}$  (left) and  $\text{Fe}_2\text{DSBDC}$  (right) clusters. Orbital energies (eV) are given below each figure. Color code: C (grey), N (blue), O (red), S (yellow), Fe (gold). Rendered using IboView.

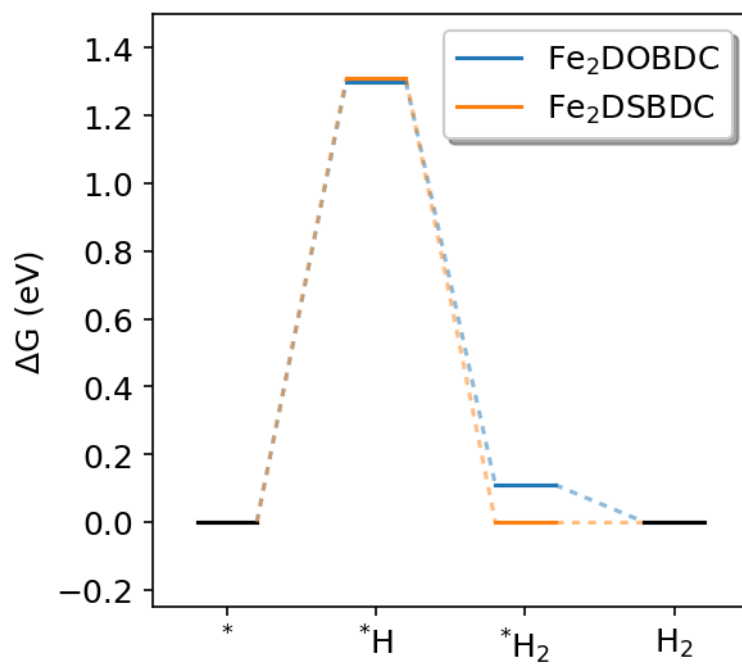

Figure S2: Reaction coordinate diagram of hydrogen reduction on the  $\text{Fe}_2\text{DOBDC}$  and  $\text{Fe}_2\text{DSBDC}$  clusters.

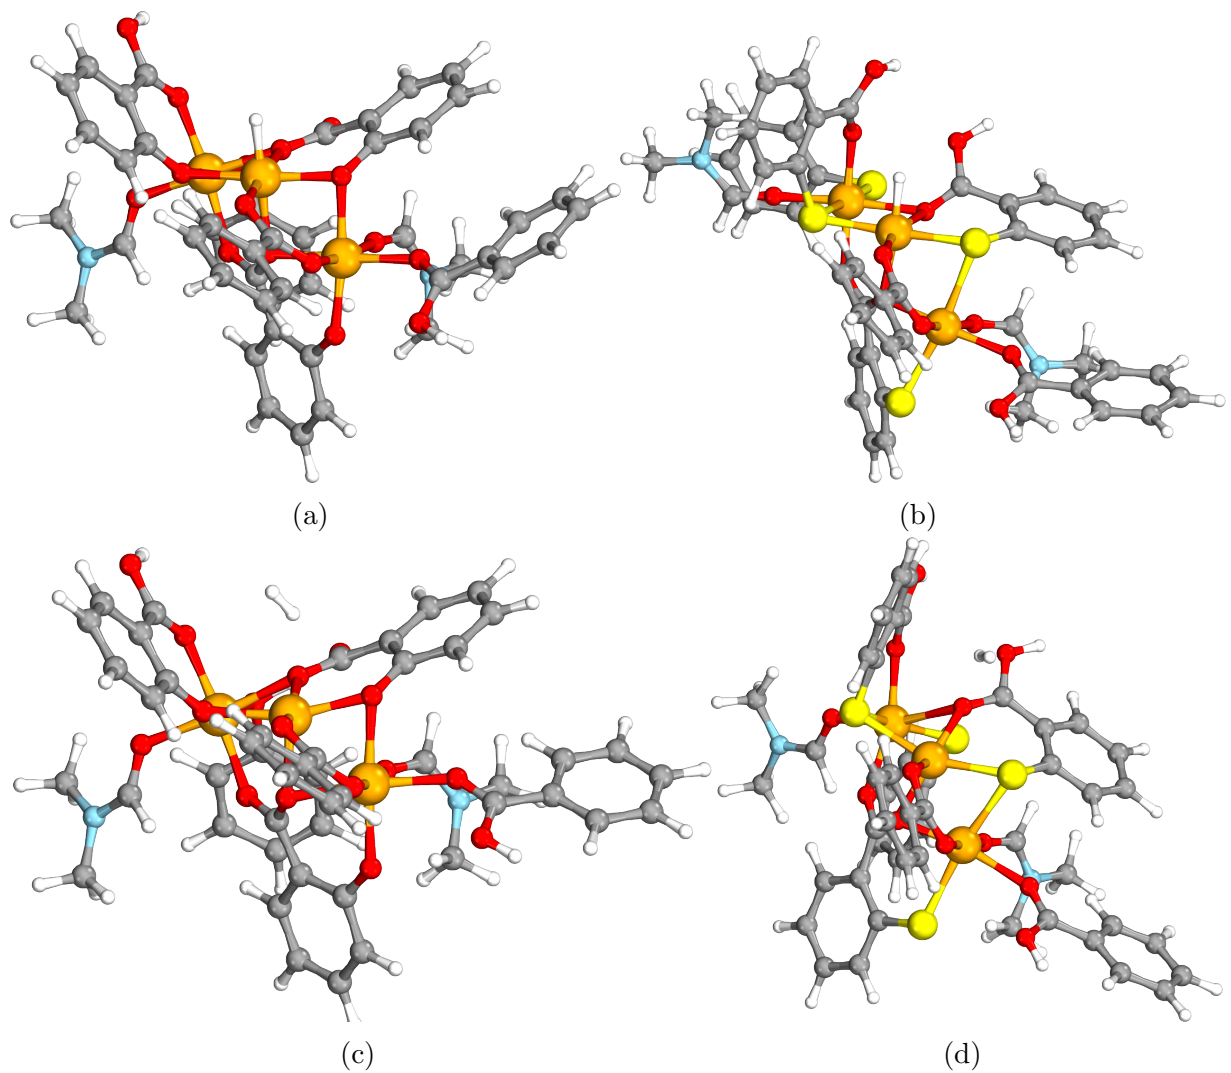

Figure S3: Molecular structures of the a)  $\text{Fe}_2\text{DOBDC-H}$ , b)  $\text{Fe}_2\text{DSBDC-H}$ , c)  $\text{Fe}_2\text{DOBDC-H}_2$ , and  $\text{Fe}_2\text{DSBDC-H}_2$  intermediates. Color code: H (white), C (grey), N (blue) O (red), S (yellow), Fe (gold).

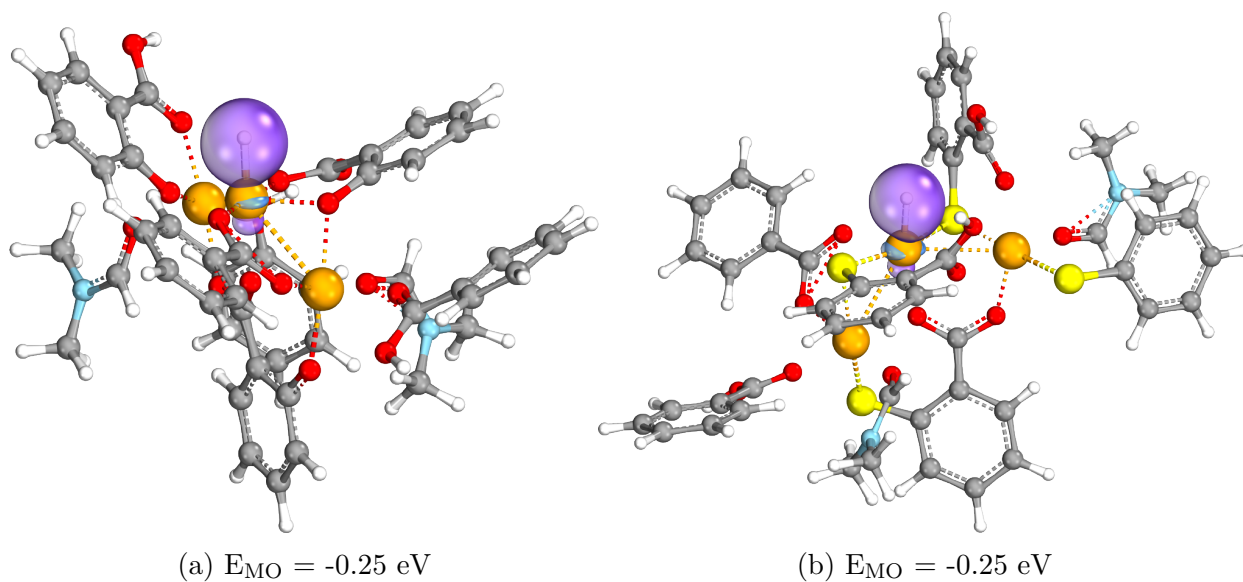

Figure S4: Localized molecular orbitals comprised of the Fe-H bonds for the a)  $\text{Fe}_2\text{DOBDC}$  and b)  $\text{Fe}_2\text{DSBDC}$  clusters. Color code: H (white), C (grey), N (blue), O (red), S (yellow), Fe (gold).

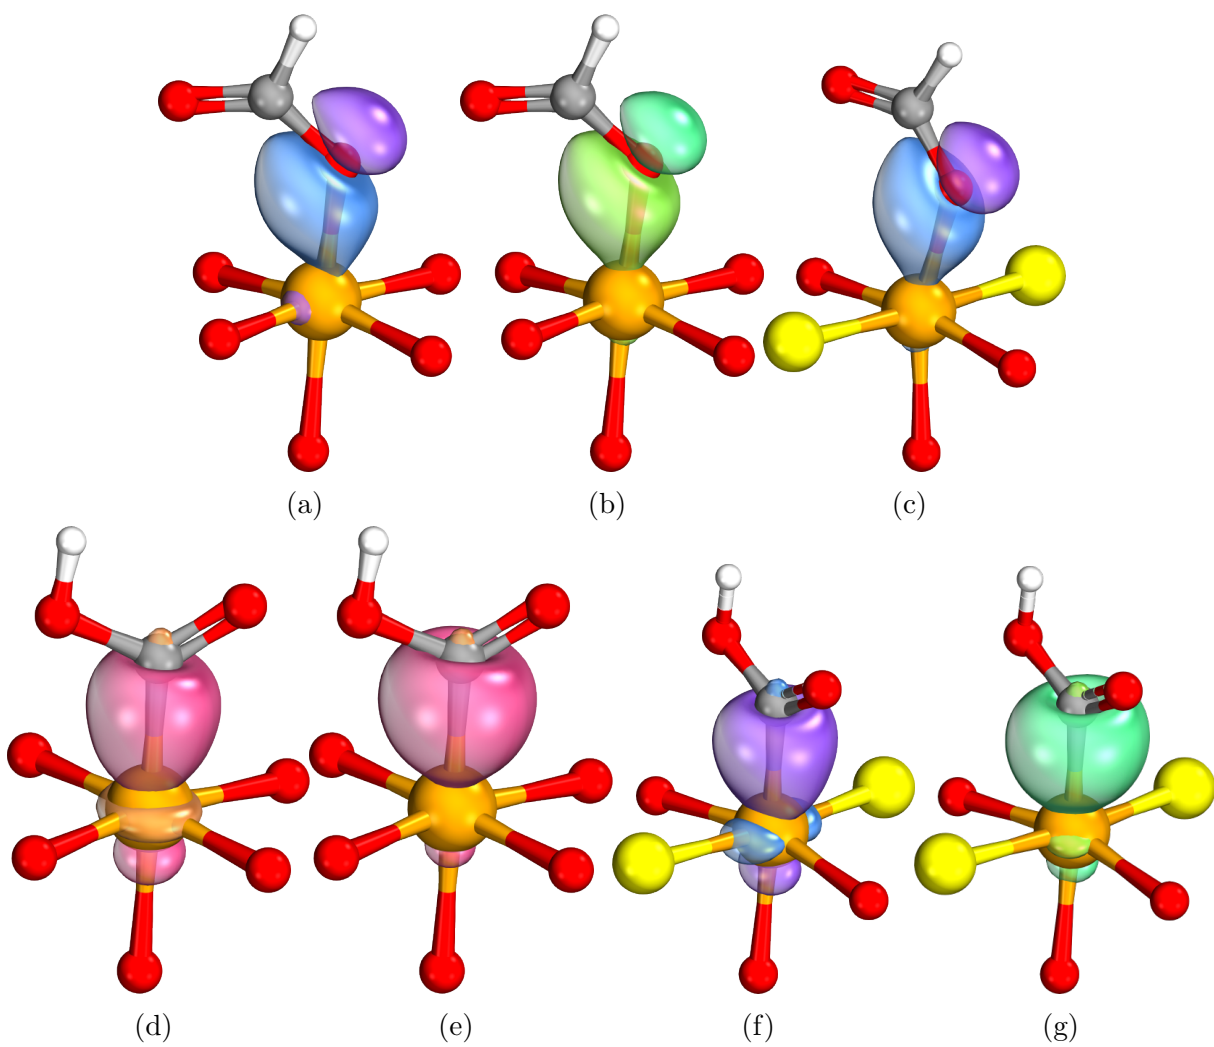

Figure S5: Localized molecular orbitals for the  $^*OCHO$  (top) and  $^*OCOH$  (bottom) intermediates. Color code: H (white), C (grey), N (blue) O (red), S (yellow), Fe (gold).

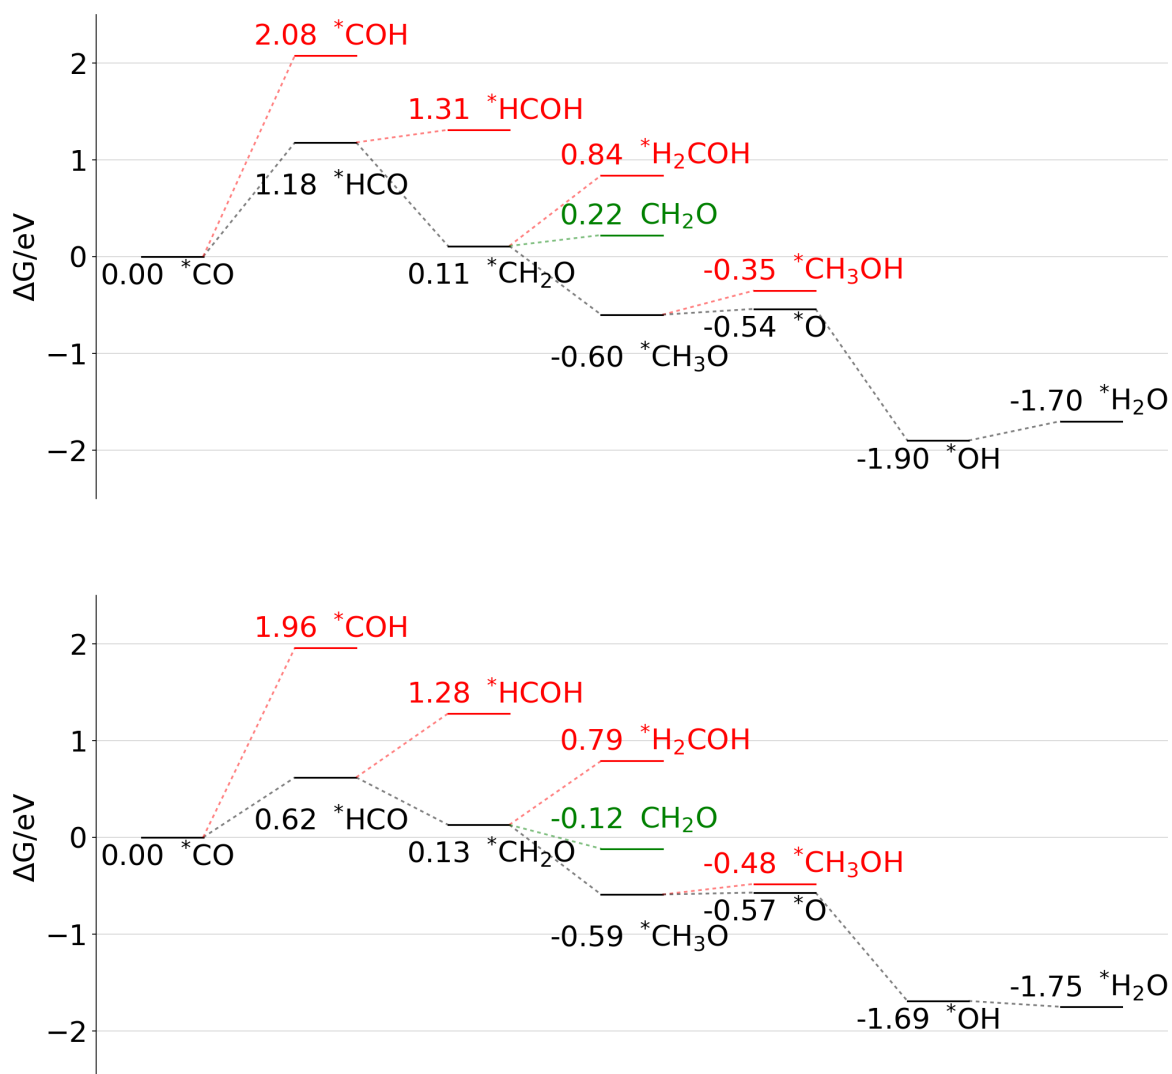

(a)

Figure S6: Free energy reaction mechanism for the reduction of CO to CH<sub>4</sub> on the (top) Fe<sub>2</sub>DOBDC and (bottom) Fe<sub>2</sub>DSBDC clusters. All energy values are relative to \*CO for each respective cluster. Color code - favorable reduction (black), unfavorable reduction (red), desorption (green).
